# Supplementary material for: Uncertainties in a carbon footprint model for detergents; quantifying the confidence in a comparative result
Source: Springer Nature journal article supplement (doi:10.1007/s11367-009-0123-3), 2009-10-28
Supplement: MOESM1 [file 5816398]

## **Supporting Information for the article:**

### **Uncertainties in a carbon footprint model for detergents; quantifying the confidence in a comparative result**

**Arjan de Koning<sup>1</sup>, Diederik Schowanek<sup>2</sup>, Joost Dewaele<sup>2</sup>, Annie Weisbrod<sup>3</sup>, Jeroen Guinée<sup>1</sup>**

1. Institute of Environmental Sciences (CML), Universiteit Leiden, PO Box 9518 2300 RA Leiden, The Netherlands

2. Procter & Gamble Eurocor, Temselaan 100, B-1853 Strombeek-Bever, Belgium

3. Procter & Gamble Company, Winton Hill Business Center, 6280 Center Hill Avenue, Cincinnati, OH 45224 USA

Corresponding author: Arjan de Koning; email: [koning@cml.leidenuniv.nl](mailto:koning@cml.leidenuniv.nl)

## 1. Sensitivity Analysis

### *Methods*

In the sensitivity analysis the most influential parameters will be determined. Two methods have been used for the sensitivity analysis. A variance based method called Fourier Amplitude Sensitivity Test (FAST; Saltelli et al. 2000; 2004) and a screening method called the Morris method. Both methods are global sensitivity analysis tools, i.e. the input parameters are varied simultaneously over their full range. Monte Carlo analysis was only used for uncertainty analysis and not used to examine the contribution of the uncertainty in input parameters to the uncertainty in the response variable(s). Simlab is the software used in the sensitivity analysis. It includes the most recent variance-based methods and screening methods for sensitivity analysis besides the more generally known regression based methods (Simlab 2004).

The Morris method is a so-called screening method that uses minimal information to determine the most sensitive parameters. It needs a smaller number of model runs compared to Monte Carlo analysis and FAST. It cannot take into account correlation coefficients among input parameters and a distribution does not have to be specified. The Morris method takes the value ranges of the input parameters as specified by a minimum and maximum and ‘jumps’ through this parameter space in a number of predefined steps meanwhile measuring the response (elementary effects) of the model. On the basis of the elementary effects a measure of sensitivity is calculated. Two measures are provided  $\mu^*$  and  $\sigma$ . The  $\mu^*$  is a measure for overall importance of the parameter. If  $\mu^*$  of a specific input parameter is higher compared to the  $\mu^*$ ’s of other parameters this specific input parameter has a larger contribution to the uncertainty in the response variable than the other input parameters. The  $\sigma$  value can be seen as a measure of non-linear influence of the parameter. The input parameters may be ranked on basis of  $\mu^*$  and  $\sigma$  but little meaning should be attributed to the absolute value of the sensitivity indices. Also the values for the  $\mu^*$  and  $\sigma$  cannot be compared between different sensitivity analysis. The method cannot be used for uncertainty analysis.

The FAST method is a variance based method (Saltelli et al. 2004). It needs a larger number of samples compared to Monte Carlo analysis. It can be used for sensitivity and uncertainty analysis. We have compared the results of the uncertainty analysis from the FAST method and the Monte Carlo analysis for a quality check. The FAST method can calculate sensitivity indices for individual parameters but also for groups of parameters. The FAST method was only used to calculate sensitivity indices for groups of parameters and is thus complementary to the Morris method. Using the FAST method for the calculation of sensitivity indices for individual parameters would have needed too much time. The sensitivity indices as calculated by the FAST method may be used quantitatively and used to express the contribution of the input parameter to total uncertainty. The FAST method uses distributions as input and takes into account correlation coefficients.

The results of the FAST analysis are shown in Figure 1 for the Compact Powder. The calculated FAST total indices are plotted as a pie chart illustrating the contribution of the uncertainty in each parameter group to the total uncertainty of the calculated carbon footprint.

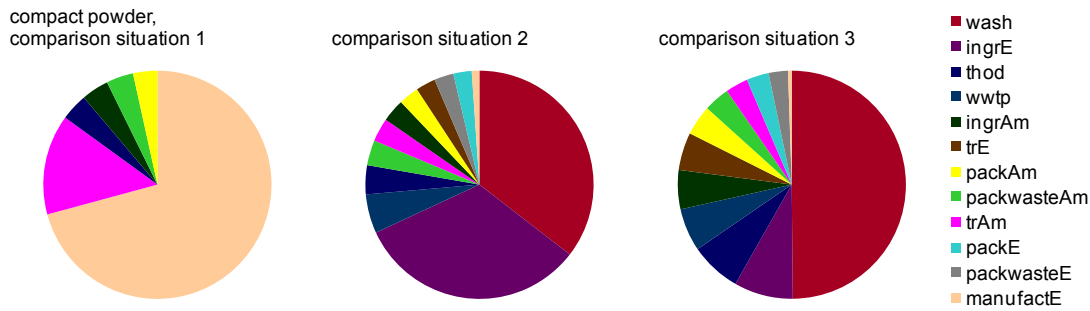

Figure 1: Contribution of the different parameter groups to the total uncertainty of the carbon footprint according to the FAST total indices for the Compact Powder product in comparison situation 1, 2 and 3.

In comparison situation 1, the uncertainty is dominated by uncertainty of the carbon footprint of the detergent manufacturing process and uncertainties of the amount of transport needed. In comparison situation 2 the uncertainty in calculated carbon footprint is dominated by uncertainties in the carbon footprint of chemicals production, the uncertainties in the use phase (efficiency washing machine) and uncertainties with regard to the greenhouse gases emanating from waste water treatment. In comparison situation 3, washing phase, chemicals production and waste water treatment are also dominating the total uncertainty of the calculated carbon footprint.

If we look at the differences between the three comparison situations, the detergent formulation process is dominant in comparison situation 1 and insignificant in comparison situation 2 and 3. The important parameter groups in comparison situation 2 and 3 are quite similar except that uncertainties in the wash phase become even more important.

The importance of the different parameter groups is also reflected in the results of the Morris method, see Table 1. The parameters that belong to groups indicated as important by the FAST method are indicated by grey rows. The most important parameters according the FAST method are always ranked high in every comparison situation according the Morris method. Having two completely different sensitivity analysis method pointing towards the same parameters as being the parameters that contribute mostly to the uncertainty in the carbon footprint increases the reliability of the results of the sensitivity analysis.

An indication of the shape and width of the distribution of the uncertainty of the carbon footprint for the Compact Powder, using the preliminary assessment of the uncertainty in the input parameters, is given in Figure 2. The resulting uncertainty increases going from comparison situation 1 to 3. The shape of the distribution is slightly skewed.

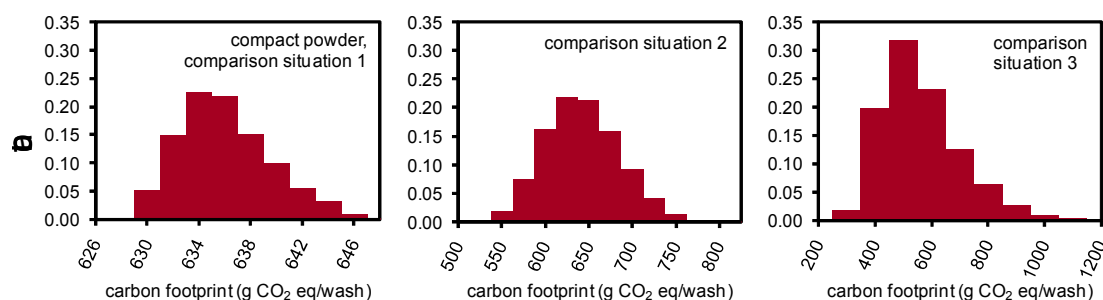

Figure 2: Shape and width of the uncertainty distribution of the carbon footprint for the Compact Powder product calculated with Monte Carlo analysis.

Table 1: Results of the sensitivity analysis using the Morris method for the Compact Powder product for comparison situation 1, 2 and 3. The Morris Index,  $\mu^*$ , is shown which is a measure of the total importance of a parameter. Grey rows indicate parameters that belong to a group which is important according the FAST analysis, see Figure 1. Only the top twenty most important input parameters are shown.

| Comparison situation 1 |         |  | Comparison situation 2 |         |  | Comparison situation 3 |          |
|------------------------|---------|--|------------------------|---------|--|------------------------|----------|
| parameter              | $\mu^*$ |  | parameter              | $\mu^*$ |  | parameter              | $\mu^*$  |
| manufactE              | 9.8462  |  | washEleK               | 97.9106 |  | tempToggle             | 360.42   |
| trrawrtopoAm           | 4.0848  |  | zeoliteE               | 66.3323 |  | EleK                   | 325.9625 |
| trrawrtoplAm           | 0.8173  |  | carbonateE             | 27.4692 |  | wwtpToggle             | 121.8669 |
| trfinrAm               | 0.793   |  | einorgwwtp             | 19.0672 |  | zeoliteE               | 64.2605  |
| zeoliteAm              | 0.5285  |  | nalasE                 | 18.8316 |  | washEleK               | 40.3287  |
| corruAm                | 0.5196  |  | percarbonateE          | 18.5065 |  | carbonateE             | 23.7292  |
| carbonateAm            | 0.4756  |  | taedE                  | 18.0145 |  | nalasE                 | 19.434   |
| nalasAm                | 0.3492  |  | co2wwtp                | 16.3023 |  | taedE                  | 18.5853  |
| percarbonateAm         | 0.3491  |  | manufactE              | 9.8462  |  | percarbonateE          | 17.9592  |
| trrawstoplAm           | 0.3401  |  | eorgwwtp               | 8.1342  |  | manufactE              | 9.2611   |
| corrulandfAm           | 0.3289  |  | truckE                 | 6.1656  |  | einorgwwtp             | 8.1087   |
| thnalas                | 0.3187  |  | ae7E                   | 5.708   |  | co2wwtp                | 6.8747   |
| waterAm                | 0.12    |  | ch4wwtp                | 4.4112  |  | ae7E                   | 5.8935   |
| taedAm                 | 0.1161  |  | trrawrtopoAm           | 3.7168  |  | truckE                 | 3.965    |
| ae7Am                  | 0.0927  |  | corruE                 | 2.9299  |  | eorgwwtp               | 3.4629   |
| thtaed                 | 0.0923  |  | citricE                | 2.5017  |  | ch4wwtp                | 3.0299   |
| ldpeAm                 | 0.0867  |  | cmcE                   | 1.6062  |  | trrawrtopoAm           | 2.8359   |
| thae7                  | 0.0846  |  | acrylicE               | 1.4261  |  | citricE                | 2.8074   |
| corrureAm              | 0.0789  |  | k1clE                  | 1.0406  |  | corruE                 | 2.6258   |
| sulfateAm              | 0.0622  |  | hedpE                  | 0.967   |  | wasteToggle            | 2.5601   |

The results of the sensitivity analysis for the Ultra Liquid product using the FAST method is given in Figure 3. In comparison situation 1 the uncertainty in the carbon footprint is mainly caused by uncertainties in the transport amounts used in the model and emissions during formulation of the detergent. Compared to the Compact Powder product, emissions during formulation of the detergent have become much less important. This is likely the result of the large difference in emissions during the formulation of the Compact Powder (129 g CO<sub>2</sub> eq/kg) and Ultra Liquid (44 g CO<sub>2</sub> eq/kg).

In comparison situation 2 and 3 the parameter groups that contribute most to the uncertainty of the carbon footprint are the wash phase, emissions in the waste water treatment and emissions during the production of chemicals for the detergent. However, compared to the Compact Powder product the importance of waste water treatment and chemicals production is not so clear cut. Differences between second third, fourth and fifth in rank are small. There is another difference between the Ultra Liquid product and the Compact Powder product. While in the Compact Powder product the importance of the wash phase increased relatively going from comparison situation 2 to 3, for the Ultra Liquid product it decreases.

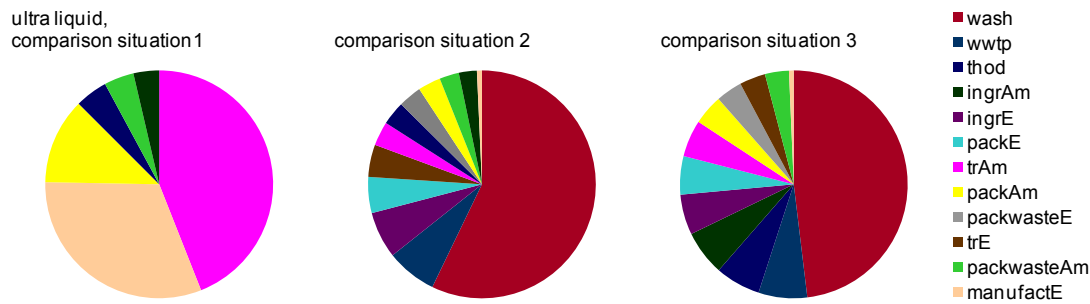

Figure 3: Contribution of the different parameter groups to the total uncertainty of the carbon footprint according to FAST total indices for Ultra Liquid in comparison situation 1, 2 and 3.

The distribution of uncertainties calculated for the Ultra Liquid product, using the preliminary assignment of uncertainties is shown in Figure 4. Just like the Compact Powder case, uncertainties increase going from comparison situation 1 to 3. The shape of the distribution is slightly skewed.

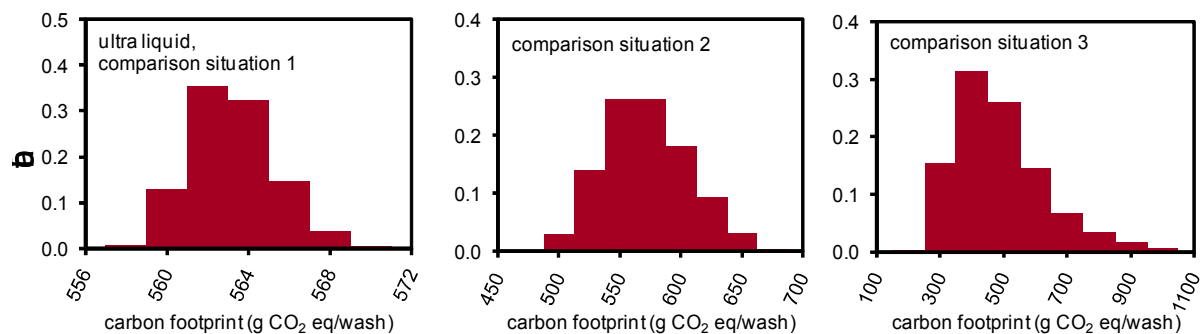

Figure 4: Shape and width of the uncertainty distribution of the carbon footprint for Ultra Liquid calculated with Monte Carlo analysis.

The results of the Morris method corroborate the findings of the FAST method except that the differences between the Morris sensitivity indexes for the parameters are not so big, see Table 2. For instance, in comparison situation 1 the amount of HDPE (packaging material) that goes into Ultra Liquid packaging (hdpeAm) scores quite high while the FAST index for the group of parameters describing the amount of package material (packAm) is ranked third. Grey rows indicate input parameters that belong to a parameter group indicated as most important according to the FAST analysis.

Table 2: Results of the sensitivity analysis using the Morris method for the Ultra Liquid product for comparison situation 1, 2 and 3. The Morris Index,  $\mu^*$ , is shown which is a measure of the total importance of a parameter. Grey rows indicate parameters that belong to a group which is important according to the FAST analysis, see Figure 3. Only the top twenty of most important parameters is shown.

| Comparison situation 1 |         |  | Comparison situation 2 |         |  | Comparison situation 3 |          |
|------------------------|---------|--|------------------------|---------|--|------------------------|----------|
| parameter              | $\mu^*$ |  | parameter              | $\mu^*$ |  | parameter              | $\mu^*$  |
| trawtopoAm             | 4.6794  |  | washEleK               | 94.5887 |  | EleK                   | 317.577  |
| manufactE              | 3.5223  |  | co2wwtp                | 23.7134 |  | tempToggle             | 269.2361 |
| hdpeAm                 | 1.7064  |  | einorgwwtp             | 18.7587 |  | wwtpToggle             | 157.6786 |
| trawrtoplAm            | 0.8838  |  | nalasE                 | 15.3045 |  | washEleK               | 46.972   |
| corrulandfAm           | 0.7658  |  | hdpeE                  | 12.9363 |  | nalasE                 | 16.2663  |
| corruAm                | 0.586   |  | c14ae7E                | 11.952  |  | hdpeE                  | 16.116   |
| nalasAm                | 0.4846  |  | eorgwwtp               | 11.5858 |  | einorgwwtp             | 11.615   |
| trawstoplAm            | 0.3897  |  | truckE                 | 8.5799  |  | c14ae7E                | 11.5864  |
| c14ae7Am               | 0.3258  |  | soapE                  | 7.6782  |  | soapE                  | 8.0906   |
| ppAm                   | 0.2976  |  | metaborateE            | 7.6756  |  | truckE                 | 7.8073   |
| thnalas                | 0.2663  |  | ch4wwtp                | 6.31    |  | metaborateE            | 7.7146   |
| waterAm                | 0.2434  |  | citrateE               | 5.8275  |  | citrateE               | 6.0159   |
| soapAm                 | 0.2232  |  | c12aesE                | 4.8761  |  | eorgwwtp               | 5.7845   |
| corrureAm              | 0.1936  |  | propglycolE            | 4.2059  |  | wasteToggle            | 5.7513   |
| thc14ae7               | 0.166   |  | manufactE              | 3.8459  |  | c12aesE                | 5.3565   |
| c12aesAm               | 0.1515  |  | trawtopoAm             | 3.394   |  | co2wwtp                | 4.738    |
| thsoap                 | 0.1264  |  | ehdqE                  | 2.4598  |  | propglycolE            | 4.4656   |
| meaborateAm            | 0.123   |  | corrulandfE            | 2.4169  |  | manufactE              | 3.8459   |
| citrateAm              | 0.1063  |  | ppE                    | 2.2953  |  | trawtopoAm             | 3.8313   |
| hdpeinceAm             | 0.1025  |  | corruE                 | 1.7884  |  | ch4wwtp                | 3.8218   |

Concluding given our preliminary assessment of the uncertainty of the input parameters, the parameters that have the largest contribution to uncertainty in the response variable are quite similar for the Compact Powder and Ultra Liquid product. In comparison situation 1, the parameters with the largest contribution are the carbon footprint of detergent formulation and transport distances. In comparison situation 2, efficiency of the washing machine, carbon footprint of chemicals production and waste water treatment are the largest contributors to the uncertainty of the carbon footprint. These are also the input parameters with the largest contribution to the uncertainty in comparison situation 3, but with a different magnitude.

## 2. Uncertainty specification input parameters Compact Powder

| Compact Powder: Comparison situation 1 |                                                                                            |                          |             |                          |         |         |
|----------------------------------------|--------------------------------------------------------------------------------------------|--------------------------|-------------|--------------------------|---------|---------|
| Stage                                  | parameter                                                                                  | mean<br>value            | unit        | mathematical description |         |         |
|                                        |                                                                                            |                          |             | distribution             | μ       | σ       |
| product ingredient production          | amount ingredients                                                                         | Nondisclosed Information |             | Nondisclosed Information |         |         |
|                                        |                                                                                            |                          |             |                          |         |         |
| packaging production                   | amount LDPE in package and bulk pack                                                       | 5.93                     | g/wash      | log normal               | 1.779   | 0.04766 |
|                                        | amount Corrugate in package and bulk pack                                                  | 98.71                    | g/wash      | log normal               | 4.591   | 0.04766 |
|                                        |                                                                                            |                          |             |                          |         |         |
| transport                              | distance transport raw material, road to port, by truck                                    | 500                      | km          | log normal               | 6.137   | 0.3931  |
|                                        | distance transport raw material, sea to plant, by ship                                     | 100                      | km          | log normal               | 4.528   | 0.3931  |
|                                        | distance transport raw material, road to plant, by truck                                   | 100                      | km          | log normal               | 4.528   | 0.3931  |
|                                        | distance transport finished product, road in UK (to oxford), by truck                      | 100                      | km          | log normal               | 4.528   | 0.3931  |
|                                        |                                                                                            |                          |             |                          |         |         |
| formula manufacturing                  | emissions during formulation compact powder                                                | 129                      | g CO2 eq/kg | log normal               | 4.783   | 0.3931  |
|                                        |                                                                                            |                          |             |                          |         |         |
| packaging waste treatment              | fraction recycling of LDPE in package and bulk pack                                        | 0.1                      | -           | log normal               | -2.311  | 0.1312  |
|                                        | fraction recycling of Corrugate in package and bulk pack                                   | 0.37                     | -           | log normal               | -1.003  | 0.1312  |
|                                        | fraction packaging landfilling of LDPE in package and bulk pack                            | 0.911                    | -           | log normal               | -0.1018 | 0.1312  |
|                                        | fraction packaging incineration with energy recovery of LDPE in package and bulk pack      | 0.088                    | -           | log normal               | -2.439  | 0.1312  |
|                                        | fraction packaging incineration w/o energy recovery of LDPE in package and bulk pack       | 0.001                    | -           | log normal               | -6.916  | 0.1312  |
|                                        | fraction packaging landfilling of Corrugate in package and bulk pack                       | 0.911                    | -           | log normal               | -0.1018 | 0.1312  |
|                                        | fraction packaging incineration with energy recovery of Corrugate in package and bulk pack | 0.088                    | -           | log normal               | -2.439  | 0.1312  |
|                                        | fraction packaging incineration w/o energy recovery of Corrugate in package and bulk pack  | 0.001                    | -           | log normal               | -6.916  | 0.1312  |
|                                        |                                                                                            |                          |             |                          |         |         |

|                       |                                   |                           |                           |
|-----------------------|-----------------------------------|---------------------------|---------------------------|
| waste water treatment | Theoretical oxygen of ingredients | Non disclosed information | Non disclosed information |
|-----------------------|-----------------------------------|---------------------------|---------------------------|

| Compact Powder: Comparison situation 2 |                                                                       |                           |                  |                           |                  |
|----------------------------------------|-----------------------------------------------------------------------|---------------------------|------------------|---------------------------|------------------|
| Stage                                  | parameter                                                             | mean value                | unit             | mathematical description  |                  |
|                                        |                                                                       |                           |                  | distribution              | $\mu$ $\sigma$   |
| use                                    | energy use washing machine (a measure of efficiency)                  | 0.0168                    | kWh/°C.wash      | normal                    | 0.01680 0.005450 |
| product ingredient production          | amount ingredients                                                    | Non-disclosed information |                  | Non-disclosed information |                  |
| packaging production                   | amount LDPE in package and bulk pack                                  | 5.93                      | g/wash           | log normal                | 1.779 0.04766    |
|                                        | amount Corrugate in package and bulk pack                             | 98.71                     | g/wash           | log normal                | 4.591 0.04766    |
|                                        | emission during production LDPE for package and bulk pack             | 2086.3                    | g CO2 eq/package | log normal                | 7.566 0.3931     |
|                                        | emission during production Corrugate for package and bulk pack        | 550.98                    | g CO2 eq/package | log normal                | 6.234 0.3931     |
| transport                              | distance transport raw material, road to port, by truck               | 500                       | km               | log normal                | 6.137 0.3931     |
|                                        | distance transport raw material, sea to plant, by ship                | 100                       | km               | log normal                | 4.528 0.3931     |
|                                        | distance transport raw material, road to plant, by truck              | 100                       | km               | log normal                | 4.528 0.3931     |
|                                        | distance transport finished product, road in UK (to oxford), by truck | 100                       | km               | log normal                | 4.528 0.3931     |
|                                        | emissions during transport by truck                                   | 107.118                   | g CO2 eq/ton.km  | log normal                | 4.597 0.3931     |
|                                        | emissions during transport by ship                                    | 44.5794                   | g CO2 eq/ton.km  | log normal                | 3.720 0.3931     |
| formula manufacturing                  | emissions during formulation compact powder                           | 129                       | g CO2 eq/kg      | log normal                | 4.783 0.3931     |
| packaging waste treatment              | fraction recycling of LDPE in package and bulk pack                   | 0.1                       | -                | log normal                | -2.311 0.1312    |
|                                        | fraction recycling of Corrugate in package and bulk pack              | 0.37                      | -                | log normal                | -1.003 0.1312    |



|                       |                                                                                            |                           |                  |                           |         |        |
|-----------------------|--------------------------------------------------------------------------------------------|---------------------------|------------------|---------------------------|---------|--------|
|                       | fraction packaging landfilling of LDPE in package and bulk pack                            | 0.911                     | -                | log normal                | -0.1018 | 0.1312 |
|                       | fraction packaging incineration with energy recovery of LDPE in package and bulk pack      | 0.088                     | -                | log normal                | -2.439  | 0.1312 |
|                       | fraction packaging incineration w/o energy recovery of LDPE in package and bulk pack       | 0.001                     | -                | log normal                | -6.916  | 0.1312 |
|                       | fraction packaging landfilling of Corrugate in package and bulk pack                       | 0.911                     | -                | log normal                | -0.1018 | 0.1312 |
|                       | fraction packaging incineration with energy recovery of Corrugate in package and bulk pack | 0.088                     | -                | log normal                | -2.439  | 0.1312 |
|                       | fraction packaging incineration w/o energy recovery of Corrugate in package and bulk pack  | 0.001                     | -                | log normal                | -6.916  | 0.1312 |
|                       | emissions during recycling of LDPE in package and bulk pack                                | 56                        | g CO2 eq/package | log normal                | 3.948   | 0.3931 |
|                       | emissions during recycling of Corrugate in package and bulk pack                           | 576.79                    | g CO2 eq/package | log normal                | 6.280   | 0.3931 |
|                       | emissions during incineration with energy recovery of LDPE                                 | 1874.001                  | g CO2 eq/package | log normal                | 7.459   | 0.3931 |
|                       | emissions during incineration w/o energy recovery of LDPE                                  | 2904.84                   | g CO2 eq/package | log normal                | 7.897   | 0.3931 |
|                       | emissions during landfilling of LDPE                                                       | 6.15                      | g CO2 eq/package | log normal                | 1.739   | 0.3931 |
|                       | emissions during incineration with energy recovery of Corrugate                            | -377.02                   | g CO2 eq/package | log normal                | 5.855   | 0.3931 |
|                       | emissions during incineration w/o energy recovery of Corrugate                             | 41.1744                   | g CO2 eq/package | log normal                | 3.641   | 0.3931 |
|                       | emissions during landfilling of Corrugate                                                  | 1198.47                   | g CO2 eq/package | log normal                | 7.012   | 0.3931 |
|                       |                                                                                            |                           |                  |                           |         |        |
| waste water treatment | Theoretical oxygen demand of ingredients                                                   | Non-disclosed information |                  | Non-disclosed information |         |        |
|                       | electricity use per kg inorganic material in WWTP                                          | 0.65                      | kWh/kg           | log normal                | -0.5080 | 0.3931 |
|                       | natural gas use per kg inorganic material in WWTP                                          | 0.0211                    | m3/kg            | log normal                | -3.936  | 0.3931 |
|                       | diesel oil use per kg inorganic material in WWTP                                           | 0.011                     | g/kg             | log normal                | -4.587  | 0.3931 |
|                       | electricity use per kg COD organic material in WWTP                                        | 0.29                      | kWh/kg COD       | log normal                | -1.315  | 0.3931 |
|                       | natural gas use per kg COD organic material in WWTP                                        | 0.0093                    | cum/kg COD       | log normal                | -4.755  | 0.3931 |
|                       | diesel oil use per kg COD organic material in WWTP                                         | 0.005                     | g/kg COD         | log normal                | -5.376  | 0.3931 |
|                       | emission of CO2 in WWTP                                                                    | 577.2                     | g CO2/kg COD     | log normal                | 6.332   | 0.2272 |
|                       | emission of CH4 in WWTP                                                                    | 6.56                      | g CO2/kg COD     | log normal                | 1.855   | 0.2272 |

| Compact Powder: Comparison situation 3 |                                                                       |                           |                  |                           |                  |
|----------------------------------------|-----------------------------------------------------------------------|---------------------------|------------------|---------------------------|------------------|
| Stage                                  | parameter                                                             | value                     | unit             | mathematical description  |                  |
|                                        |                                                                       |                           |                  | distribution              | $\mu$ $\sigma$   |
| use                                    | washing temperature                                                   | 30/40                     | °C               | discrete uniform          | n.a. n.a.        |
|                                        | energy use washing machine (a measure of efficiency)                  | 0.0168                    | kWh/°C.wash      | normal                    | 0.01680 0.005450 |
|                                        | emissions during electricity generation for washing machine           | 570                       | g CO2 eq/kWh     | log normal                | 6.326 0.1982     |
| product ingredient production          | amount ingredients                                                    | Non-disclosed information |                  | Non-disclosed information |                  |
| packaging production                   | amount LDPE in package and bulk pack                                  | 5.93                      | g/wash           | log normal                | 1.779 0.04766    |
|                                        | amount Corrugate in package and bulk pack                             | 98.71                     | g/wash           | log normal                | 4.591 0.04766    |
|                                        | emission during production LDPE for package and bulk pack             | 2086.3                    | g CO2 eq/package | log normal                | 7.566 0.3931     |
|                                        | emission during production Corrugate for package and bulk pack        | 550.98                    | g CO2 eq/package | log normal                | 6.234 0.3931     |
| transport                              | distance transport raw material, road to port, by truck               | 500                       | km               | log normal                | 6.137 0.3931     |
|                                        | distance transport raw material, sea to plant, by ship                | 100                       | km               | log normal                | 4.528 0.3931     |
|                                        | distance transport raw material, road to plant, by truck              | 100                       | km               | log normal                | 4.528 0.3931     |
|                                        | distance transport finished product, road in UK (to oxford), by truck | 100                       | km               | log normal                | 4.528 0.3931     |
|                                        | emissions during transport by truck                                   | 107.118                   | g CO2 eq/ton.km  | log normal                | 4.597 0.3931     |
|                                        | emissions during transport by ship                                    | 44.5794                   | g CO2 eq/ton.km  | log normal                | 3.720 0.3931     |
| formula manufacturing                  | emissions during formulation compact powder                           | 129                       | g CO2 eq/kg      | log normal                | 4.783 0.3931     |
| packaging waste treatment              | waste treatment package material                                      | yes/no                    | -                | discrete uniform          | n.a. n.a.        |
|                                        | fraction recycling of LDPE in package and bulk pack                   | 0.1                       | -                | log normal                | -2.311 0.1312    |
|                                        | fraction recycling of Corrugate in package and bulk pack              | 0.37                      | -                | log normal                | -1.003 0.1312    |

|                       |                                                                                                                                                                                                                                                                                                                                                                                                                                                                                                                                                                                                                                                                                                                                                                                                                                                                                                                                                                                                                     |                                                                                                                                                                                                                                                                                                |                                                                                                                                                                                        |                                                                                                                                            |                                                                                                                           |
|-----------------------|---------------------------------------------------------------------------------------------------------------------------------------------------------------------------------------------------------------------------------------------------------------------------------------------------------------------------------------------------------------------------------------------------------------------------------------------------------------------------------------------------------------------------------------------------------------------------------------------------------------------------------------------------------------------------------------------------------------------------------------------------------------------------------------------------------------------------------------------------------------------------------------------------------------------------------------------------------------------------------------------------------------------|------------------------------------------------------------------------------------------------------------------------------------------------------------------------------------------------------------------------------------------------------------------------------------------------|----------------------------------------------------------------------------------------------------------------------------------------------------------------------------------------|--------------------------------------------------------------------------------------------------------------------------------------------|---------------------------------------------------------------------------------------------------------------------------|
|                       | fraction packaging landfilling of LDPE in package and bulk pack<br>fraction packaging incineration with energy recovery of LDPE in package and bulk pack<br>fraction packaging incineration w/o energy recovery of LDPE in package and bulk pack<br>fraction packaging landfilling of Corrugate in package and bulk pack<br>fraction packaging incineration with energy recovery of Corrugate in package and bulk pack<br>fraction packaging incineration w/o energy recovery of Corrugate in package and bulk pack<br><br>emissions during recycling of LDPE in package and bulk pack<br>emissions during recycling of Corrugate in package and bulk pack<br><br>emissions during incineration with energy recovery of LDPE<br>emissions during incineration w/o energy recovery of LDPE<br>emissions during landfilling of LDPE<br>emissions during incineration with energy recovery of Corrugate<br>emissions during incineration w/o energy recovery of Corrugate<br>emissions during landfilling of Corrugate | 0.911 -<br>0.088 -<br>0.001 -<br>0.911 -<br>0.088 -<br>0.001 -<br><br>56 g CO2 eq/package<br>576.79 g CO2 eq/package<br><br>1874.001 g CO2 eq/package<br>2904.84 g CO2 eq/package<br>6.15 g CO2 eq/package<br>-377.02 g CO2 eq/package<br>41.1744 g CO2 eq/package<br>1198.47 g CO2 eq/package | log normal<br>log normal<br>log normal<br>log normal<br>log normal<br>log normal<br><br>log normal<br>log normal<br>log normal<br>log normal<br>log normal<br>log normal<br>log normal | -0.1018<br>-2.439<br>-6.916<br>-0.1018<br>-2.439<br>-6.916<br><br>3.948<br>6.280<br><br>7.459<br>7.897<br>1.739<br>5.855<br>3.641<br>7.012 | 0.1312<br>0.1312<br>0.1312<br>0.1312<br>0.1312<br>0.1312<br><br>0.3931<br>0.3931<br>0.3931<br>0.3931<br>0.3931<br>0.3931  |
| waste water treatment | waste water treatment plant<br>Theoretical oxygen demand of ingredients<br><br>electricity use per kg inorganic material in WWTP<br>natural gas use per kg inorganic material in WWTP<br>diesel oil use per kg inorganic material in WWTP<br>electricity use per kg COD organic material in WWTP<br>natural gas use per kg COD organic material in WWTP<br>diesel oil use per kg COD organic material in WWTP<br><br>emission of CO2 in WWTP<br>emission of CH4 in WWTP                                                                                                                                                                                                                                                                                                                                                                                                                                                                                                                                             | yes/no -<br>Non-disclosed information<br><br>0.65 kWh/kg<br>0.0211 m3/kg<br>0.011 g/kg<br>0.29 kWh/kg COD<br>0.0093 cum/kg COD<br>0.005 g/kg COD<br><br>577.2 g CO2/kg COD<br>6.56 g CO2/kg COD                                                                                                | discrete uniform<br>Non-disclosed information<br><br>log normal<br>log normal<br>log normal<br>log normal<br>log normal<br>log normal<br><br>log normal<br>log normal                  | n.a.<br>Non-disclosed information<br><br>-0.5080<br>-3.936<br>-4.587<br>-1.315<br>-4.755<br>-5.376<br><br>6.332<br>1.855                   | n.a.<br>Non-disclosed information<br><br>0.3931<br>0.3931<br>0.3931<br>0.3931<br>0.3931<br>0.3931<br><br>0.2272<br>0.2272 |



### 3. Uncertainty specification input parameters Ultra Liquid

| Ultra Liquid: Comparison situation 1                            |                                                                                       |                           |             |                           |         |         |
|-----------------------------------------------------------------|---------------------------------------------------------------------------------------|---------------------------|-------------|---------------------------|---------|---------|
| Stage                                                           | parameter                                                                             | mean<br>value             | unit        | mathematical description  |         |         |
|                                                                 |                                                                                       |                           |             | distribution              | μ       | σ       |
|                                                                 |                                                                                       |                           |             |                           |         |         |
| product ingredient production                                   | amount ingredients                                                                    | Non-disclosed information |             | Non-disclosed information |         |         |
|                                                                 |                                                                                       |                           |             |                           |         |         |
| packaging production                                            | amount HDPE in package and bulk pack                                                  | 68.5                      | g/wash      | log normal                | 4.226   | 0.04766 |
|                                                                 | amount PP in package and bulk pack                                                    | 10                        | g/wash      | log normal                | 2.301   | 0.04766 |
|                                                                 | amount LDPE in package and bulk pack                                                  | 0.688888889               | g/wash      | log normal                | -0.3738 | 0.04766 |
|                                                                 | amount Corrugate in package and bulk pack                                             | 62.85555556               | g/wash      | log normal                | 4.140   | 0.04766 |
| transport                                                       | distance transport raw material, road to port, by truck                               | 500                       | km          | log normal                | 6.137   | 0.3931  |
|                                                                 | distance transport raw material, sea to plant, by ship                                | 100                       | km          | log normal                | 4.528   | 0.3931  |
|                                                                 | distance transport raw material, road to plant, by truck                              | 100                       | km          | log normal                | 4.528   | 0.3931  |
|                                                                 |                                                                                       |                           |             |                           |         |         |
| formula manufacturing                                           | emissions during formulation compact powder                                           | 44                        | g CO2 eq/kg | log normal                | 3.707   | 0.3931  |
|                                                                 |                                                                                       |                           |             |                           |         |         |
| packaging waste treatment                                       | fraction recycling of HDPE in package and bulk pack                                   | 0.5                       | -           | log normal                | -0.7018 | 0.1312  |
|                                                                 | fraction recycling of LDPE in package and bulk pack                                   | 0.1                       | -           | log normal                | -2.311  | 0.1312  |
|                                                                 | fraction recycling of Corrugate in package and bulk pack                              | 0.37                      | -           | log normal                | -1.003  | 0.1312  |
|                                                                 |                                                                                       |                           |             |                           |         |         |
|                                                                 | fraction packaging landfilling of HDPE in package and bulk pack                       | 0.911                     | -           | log normal                | -0.1018 | 0.1312  |
|                                                                 | fraction packaging incineration with energy recovery of HDPE in package and bulk pack | 0.088                     | -           | log normal                | -2.439  | 0.1312  |
|                                                                 | fraction packaging incineration w/o energy recovery of HDPE in package and bulk pack  | 0.001                     | -           | log normal                | -6.916  | 0.1312  |
|                                                                 | fraction packaging landfilling of PP in package and bulk pack                         | 0.911                     | -           | log normal                | -0.1018 | 0.1312  |
|                                                                 | fraction packaging incineration with energy recovery of PP in package and bulk pack   | 0.088                     | -           | log normal                | -2.439  | 0.1312  |
|                                                                 | fraction packaging incineration w/o energy recovery of PP in package and bulk pack    | 0.001                     | -           | log normal                | -6.916  | 0.1312  |
| fraction packaging landfilling of LDPE in package and bulk pack | 0.911                                                                                 | -                         | log normal  | -0.1018                   | 0.1312  |         |

|                       |                                                                                            |                           |   |                           |         |        |
|-----------------------|--------------------------------------------------------------------------------------------|---------------------------|---|---------------------------|---------|--------|
|                       | fraction packaging incineration with energy recovery of LDPE in package and bulk pack      | 0.088                     | - | log normal                | -2.439  | 0.1312 |
|                       | fraction packaging incineration w/o energy recovery of LDPE in package and bulk pack       | 0.001                     | - | log normal                | -6.916  | 0.1312 |
|                       | fraction packaging landfilling of Corrugate in package and bulk pack                       | 0.911                     | - | log normal                | -0.1018 | 0.1312 |
|                       | fraction packaging incineration with energy recovery of Corrugate in package and bulk pack | 0.088                     | - | log normal                | -2.439  | 0.1312 |
|                       | fraction packaging incineration w/o energy recovery of Corrugate in package and bulk pack  | 0.001                     | - | log normal                | -6.916  | 0.1312 |
| waste water treatment | Theoretical oxygen demand ingredients                                                      | Non-disclosed information |   | Non-disclosed information |         |        |

| Ultra Liquid: Comparison situation 2 |                                                                |                           |                  |                           |         |          |
|--------------------------------------|----------------------------------------------------------------|---------------------------|------------------|---------------------------|---------|----------|
| Stage                                | parameter                                                      | mean value                | unit             | mathematical description  |         |          |
|                                      |                                                                |                           |                  | distribution              | $\mu$   | $\sigma$ |
| use                                  | energy use washing machine (a measure of efficiency)           | 0.0168                    | kWh/°C.wash      | normal                    | 0.01680 | 0.005450 |
| product ingredient production        | amount ingredients                                             | Non-disclosed information |                  | Non-disclosed information |         |          |
| packaging production                 | amount HDPE in package and bulk pack                           | 68.5                      | g/wash           | log normal                | 4.226   | 0.04766  |
|                                      | amount PP in package and bulk pack                             | 10                        | g/wash           | log normal                | 2.301   | 0.04766  |
|                                      | amount LDPE in package and bulk pack                           | 0.688888889               | g/wash           | log normal                | -0.3738 | 0.04766  |
|                                      | amount Corrugate in package and bulk pack                      | 62.85555556               | g/wash           | log normal                | 4.140   | 0.04766  |
|                                      | emission during production HDPE for package and bulk pack      | 3700                      | g CO2 eq/package | log normal                | 8.139   | 0.3931   |
|                                      | emission during production PP for package and bulk pack        | 4400                      | g CO2 eq/package | log normal                | 8.312   | 0.3931   |
|                                      | emission during production LDPE for package and bulk pack      | 2086.3                    | g CO2 eq/package | log normal                | 7.566   | 0.3931   |
|                                      | emission during production Corrugate for package and bulk pack | 550.98                    | g CO2 eq/package | log normal                | 6.234   | 0.3931   |
| transport                            | distance transport raw material, road to port, by truck        | 500                       | km               | log normal                | 6.137   | 0.3931   |

|                           |                                                                                            |          |                  |            |         |        |
|---------------------------|--------------------------------------------------------------------------------------------|----------|------------------|------------|---------|--------|
|                           | distance transport raw material, sea to plant, by ship                                     | 100      | km               | log normal | 4.528   | 0.3931 |
|                           | distance transport raw material, road to plant, by truck                                   | 100      | km               | log normal | 4.528   | 0.3931 |
|                           | emissions during transport by truck                                                        | 107.118  | g CO2 eq/ton.km  | log normal | 4.597   | 0.3931 |
|                           | emissions during transport by ship                                                         | 44.5794  | g CO2 eq/ton.km  | log normal | 3.720   | 0.3931 |
|                           |                                                                                            |          |                  |            |         |        |
| formula manufacturing     | emissions during formulation compact powder                                                | 44       | g CO2 eq/kg      | log normal | 3.707   | 0.3931 |
|                           |                                                                                            |          |                  |            |         |        |
| packaging waste treatment | fraction recycling of HDPE in package and bulk pack                                        | 0.5      | -                | log normal | -0.7018 | 0.1312 |
|                           | fraction recycling of LDPE in package and bulk pack                                        | 0.1      | -                | log normal | -2.311  | 0.1312 |
|                           | fraction recycling of Corrugate in package and bulk pack                                   | 0.37     | -                | log normal | -1.003  | 0.1312 |
|                           | fraction packaging landfilling of HDPE in package and bulk pack                            | 0.911    | -                | log normal | -0.1018 | 0.1312 |
|                           | fraction packaging incineration with energy recovery of HDPE in package and bulk pack      | 0.088    | -                | log normal | -2.439  | 0.1312 |
|                           | fraction packaging incineration w/o energy recovery of HDPE in package and bulk pack       | 0.001    | -                | log normal | -6.916  | 0.1312 |
|                           | fraction packaging landfilling of PP in package and bulk pack                              | 0.911    | -                | log normal | -0.1018 | 0.1312 |
|                           | fraction packaging incineration with energy recovery of PP in package and bulk pack        | 0.088    | -                | log normal | -2.439  | 0.1312 |
|                           | fraction packaging incineration w/o energy recovery of PP in package and bulk pack         | 0.001    | -                | log normal | -6.916  | 0.1312 |
|                           | fraction packaging landfilling of LDPE in package and bulk pack                            | 0.911    | -                | log normal | -0.1018 | 0.1312 |
|                           | fraction packaging incineration with energy recovery of LDPE in package and bulk pack      | 0.088    | -                | log normal | -2.439  | 0.1312 |
|                           | fraction packaging incineration w/o energy recovery of LDPE in package and bulk pack       | 0.001    | -                | log normal | -6.916  | 0.1312 |
|                           | fraction packaging landfilling of Corrugate in package and bulk pack                       | 0.911    | -                | log normal | -0.1018 | 0.1312 |
|                           | fraction packaging incineration with energy recovery of Corrugate in package and bulk pack | 0.088    | -                | log normal | -2.439  | 0.1312 |
|                           | fraction packaging incineration w/o energy recovery of Corrugate in package and bulk pack  | 0.001    | -                | log normal | -6.916  | 0.1312 |
|                           | emissions during recycling of HDPE in package and bulk pack                                | 56       | g CO2 eq/package | log normal | 3.948   | 0.3931 |
|                           | emissions during recycling of LDPE in package and bulk pack                                | 56       | g CO2 eq/package | log normal | 3.948   | 0.3931 |
|                           | emissions during recycling of Corrugate in package and bulk pack                           | 576.79   | g CO2 eq/package | log normal | 6.280   | 0.3931 |
|                           | emissions during incineration with energy recovery of HDPE                                 | 1874.001 | g CO2 eq/package | log normal | 7.459   | 0.3931 |
|                           | emissions during incineration w/o energy recovery of HDPE                                  | 2904.84  | g CO2 eq/package | log normal | 7.897   | 0.3931 |

|                       |                                                                 |                           |                  |                           |         |        |
|-----------------------|-----------------------------------------------------------------|---------------------------|------------------|---------------------------|---------|--------|
|                       | emissions during landfilling of HDPE                            | 6.15                      | g CO2 eq/package | log normal                | 1.739   | 0.3931 |
|                       | emissions during incineration with energy recovery of PP        | 1675.48                   | g CO2 eq/package | log normal                | 7.347   | 0.3931 |
|                       | emissions during incineration w/o energy recovery of PP         | 2904.84                   | g CO2 eq/package | log normal                | 7.897   | 0.3931 |
|                       | emissions during landfilling of PP                              | 6.15                      | g CO2 eq/package | log normal                | 1.739   | 0.3931 |
|                       | emissions during incineration with energy recovery of LDPE      | 1874.001                  | g CO2 eq/package | log normal                | 7.459   | 0.3931 |
|                       | emissions during incineration w/o energy recovery of LDPE       | 2904.84                   | g CO2 eq/package | log normal                | 7.897   | 0.3931 |
|                       | emissions during landfilling of LDPE                            | 6.15                      | g CO2 eq/package | log normal                | 1.739   | 0.3931 |
|                       | emissions during incineration with energy recovery of Corrugate | -377.02                   | g CO2 eq/package | log normal                | 5.855   | 0.3931 |
|                       | emissions during incineration w/o energy recovery of Corrugate  | 41.1744                   | g CO2 eq/package | log normal                | 3.641   | 0.3931 |
|                       | emissions during landfilling of Corrugate                       | 1198.47                   | g CO2 eq/package | log normal                | 7.012   | 0.3931 |
|                       |                                                                 |                           |                  |                           |         |        |
| waste water treatment | Theoretical oxygen demand of ingredients                        | Non-disclosed information |                  | Non-disclosed information |         |        |
|                       | electricity use per kg inorganic material in WWTP               | 0.65                      | kWh/kg           | log normal                | -0.5080 | 0.3931 |
|                       | natural gas use per kg inorganic material in WWTP               | 0.0211                    | m3/kg            | log normal                | -3.936  | 0.3931 |
|                       | diesel oil use per kg inorganic material in WWTP                | 0.011                     | g/kg             | log normal                | -4.587  | 0.3931 |
|                       | electricity use per kg COD organic material in WWTP             | 0.29                      | kWh/kg COD       | log normal                | -1.315  | 0.3931 |
|                       | natural gas use per kg COD organic material in WWTP             | 0.0093                    | cum/kg COD       | log normal                | -4.755  | 0.3931 |
|                       | diesel oil use per kg COD organic material in WWTP              | 0.005                     | g/kg COD         | log normal                | -5.376  | 0.3931 |
|                       | emission of CO2 in WWTP                                         | 577.2                     | g CO2/kg COD     | log normal                | 6.332   | 0.2272 |
|                       | emission of CH4 in WWTP                                         | 6.56                      | g CO2/kg COD     | log normal                | 1.855   | 0.2272 |

| Ultra Liquid: Comparison situation 3 |           |            |      |                          |       |          |
|--------------------------------------|-----------|------------|------|--------------------------|-------|----------|
| Stage                                | parameter | mean value | unit | mathematical description |       |          |
|                                      |           |            |      | distribution             | $\mu$ | $\sigma$ |



|                               |                                                                |                           |                  |                           |         |          |
|-------------------------------|----------------------------------------------------------------|---------------------------|------------------|---------------------------|---------|----------|
|                               |                                                                |                           |                  |                           |         |          |
| use                           | washing temperature                                            | 30/40                     | °C               | discrete                  | n.a.    | n.a.     |
|                               | energy use washing machine (a measure of efficiency)           | 0.0168                    | kWh/°C.wash      | uniform normal            | 0.01680 | 0.005450 |
|                               | emissions during electricity generation for washing machine    | 570                       | g CO2 eq/kWh     | log normal                | 6.326   | 0.1982   |
|                               |                                                                |                           |                  |                           |         |          |
| product ingredient production | amount ingredients                                             | Non-disclosed information |                  | Non-disclosed information |         |          |
|                               |                                                                |                           |                  |                           |         |          |
| packaging production          | amount HDPE in package and bulk pack                           | 68.5                      | g/wash           | log normal                | 4.226   | 0.04766  |
|                               | amount PP in package and bulk pack                             | 10                        | g/wash           | log normal                | 2.301   | 0.04766  |
|                               | amount LDPE in package and bulk pack                           | 0.688888889               | g/wash           | log normal                | -0.3738 | 0.04766  |
|                               | amount Corrugate in package and bulk pack                      | 62.85555556               | g/wash           | log normal                | 4.140   | 0.04766  |
|                               | emission during production HDPE for package and bulk pack      | 3700                      | g CO2 eq/package | log normal                | 8.139   | 0.3931   |
|                               | emission during production PP for package and bulk pack        | 4400                      | g CO2 eq/package | log normal                | 8.312   | 0.3931   |
|                               | emission during production LDPE for package and bulk pack      | 2086.3                    | g CO2 eq/package | log normal                | 7.566   | 0.3931   |
|                               | emission during production Corrugate for package and bulk pack | 550.98                    | g CO2 eq/package | log normal                | 6.234   | 0.3931   |
|                               |                                                                |                           |                  |                           |         |          |
| transport                     | distance transport raw material, road to port, by truck        | 500                       | km               | log normal                | 6.137   | 0.3931   |
|                               | distance transport raw material, sea to plant, by ship         | 100                       | km               | log normal                | 4.528   | 0.3931   |
|                               | distance transport raw material, road to plant, by truck       | 100                       | km               | log normal                | 4.528   | 0.3931   |
|                               | emissions during transport by truck                            | 107.118                   | g CO2 eq/ton.km  | log normal                | 4.597   | 0.3931   |
|                               | emissions during transport by ship                             | 44.5794                   | g CO2 eq/ton.km  | log normal                | 3.720   | 0.3931   |
|                               |                                                                |                           |                  |                           |         |          |
| formula manufacturing         | emissions during formulation compact powder                    | 44                        | g CO2 eq/kg      | log normal                | 3.707   | 0.3931   |
|                               |                                                                |                           |                  |                           |         |          |
| packaging waste treatment     | include packaging waste treatment                              | yes/no                    | -                | discrete uniform          | n.a.    | n.a.     |
|                               | fraction recycling of HDPE in package and bulk pack            | 0.5                       | -                | log normal                | -0.7018 | 0.1312   |
|                               | fraction recycling of LDPE in package and bulk pack            | 0.1                       | -                | log normal                | -2.311  | 0.1312   |
|                               | fraction recycling of Corrugate in package and bulk pack       | 0.37                      | -                | log normal                | -1.003  | 0.1312   |

|                       |                                                                                            |          |                  |                  |         |        |
|-----------------------|--------------------------------------------------------------------------------------------|----------|------------------|------------------|---------|--------|
|                       | fraction packaging landfilling of HDPE in package and bulk pack                            | 0.911    | -                | log normal       | -0.1018 | 0.1312 |
|                       | fraction packaging incineration with energy recovery of HDPE in package and bulk pack      | 0.088    | -                | log normal       | -2.439  | 0.1312 |
|                       | fraction packaging incineration w/o energy recovery of HDPE in package and bulk pack       | 0.001    | -                | log normal       | -6.916  | 0.1312 |
|                       | fraction packaging landfilling of PP in package and bulk pack                              | 0.911    | -                | log normal       | -0.1018 | 0.1312 |
|                       | fraction packaging incineration with energy recovery of PP in package and bulk pack        | 0.088    | -                | log normal       | -2.439  | 0.1312 |
|                       | fraction packaging incineration w/o energy recovery of PP in package and bulk pack         | 0.001    | -                | log normal       | -6.916  | 0.1312 |
|                       | fraction packaging landfilling of LDPE in package and bulk pack                            | 0.911    | -                | log normal       | -0.1018 | 0.1312 |
|                       | fraction packaging incineration with energy recovery of LDPE in package and bulk pack      | 0.088    | -                | log normal       | -2.439  | 0.1312 |
|                       | fraction packaging incineration w/o energy recovery of LDPE in package and bulk pack       | 0.001    | -                | log normal       | -6.916  | 0.1312 |
|                       | fraction packaging landfilling of Corrugate in package and bulk pack                       | 0.911    | -                | log normal       | -0.1018 | 0.1312 |
|                       | fraction packaging incineration with energy recovery of Corrugate in package and bulk pack | 0.088    | -                | log normal       | -2.439  | 0.1312 |
|                       | fraction packaging incineration w/o energy recovery of Corrugate in package and bulk pack  | 0.001    | -                | log normal       | -6.916  | 0.1312 |
|                       | emissions during recycling of HDPE in package and bulk pack                                | 56       | g CO2 eq/package | log normal       | 3.948   | 0.3931 |
|                       | emissions during recycling of LDPE in package and bulk pack                                | 56       | g CO2 eq/package | log normal       | 3.948   | 0.3931 |
|                       | emissions during recycling of Corrugate in package and bulk pack                           | 576.79   | g CO2 eq/package | log normal       | 6.280   | 0.3931 |
|                       | emissions during incineration with energy recovery of HDPE                                 | 1874.001 | g CO2 eq/package | log normal       | 7.459   | 0.3931 |
|                       | emissions during incineration w/o energy recovery of HDPE                                  | 2904.84  | g CO2 eq/package | log normal       | 7.897   | 0.3931 |
|                       | emissions during landfilling of HDPE                                                       | 6.15     | g CO2 eq/package | log normal       | 1.739   | 0.3931 |
|                       | emissions during incineration with energy recovery of PP                                   | 1675.48  | g CO2 eq/package | log normal       | 7.347   | 0.3931 |
|                       | emissions during incineration w/o energy recovery of PP                                    | 2904.84  | g CO2 eq/package | log normal       | 7.897   | 0.3931 |
|                       | emissions during landfilling of PP                                                         | 6.15     | g CO2 eq/package | log normal       | 1.739   | 0.3931 |
|                       | emissions during incineration with energy recovery of LDPE                                 | 1874.001 | g CO2 eq/package | log normal       | 7.459   | 0.3931 |
|                       | emissions during incineration w/o energy recovery of LDPE                                  | 2904.84  | g CO2 eq/package | log normal       | 7.897   | 0.3931 |
|                       | emissions during landfilling of LDPE                                                       | 6.15     | g CO2 eq/package | log normal       | 1.739   | 0.3931 |
|                       | emissions during incineration with energy recovery of Corrugate                            | -377.02  | g CO2 eq/package | log normal       | 5.855   | 0.3931 |
|                       | emissions during incineration w/o energy recovery of Corrugate                             | 41.1744  | g CO2 eq/package | log normal       | 3.641   | 0.3931 |
|                       | emissions during landfilling of Corrugate                                                  | 1198.47  | g CO2 eq/package | log normal       | 7.012   | 0.3931 |
|                       |                                                                                            |          |                  |                  |         |        |
| waste water treatment | include waste water treatment                                                              | yes/no   | -                | discrete uniform | n.a.    | n.a.   |

|  |                                                     |                           |              |                           |                |
|--|-----------------------------------------------------|---------------------------|--------------|---------------------------|----------------|
|  | Theoretical oxygen demand of ingredients            | Non-disclosed information |              | Non-disclosed information |                |
|  | electricity use per kg inorganic material in WWTP   | 0.65                      | kWh/kg       | log normal                | -0.5080 0.3931 |
|  | natural gas use per kg inorganic material in WWTP   | 0.0211                    | m3/kg        | log normal                | -3.936 0.3931  |
|  | diesel oil use per kg inorganic material in WWTP    | 0.011                     | g/kg         | log normal                | -4.587 0.3931  |
|  | electricity use per kg COD organic material in WWTP | 0.29                      | kWh/kg COD   | log normal                | -1.315 0.3931  |
|  | natural gas use per kg COD organic material in WWTP | 0.0093                    | cum/kg COD   | log normal                | -4.755 0.3931  |
|  | diesel oil use per kg COD organic material in WWTP  | 0.005                     | g/kg COD     | log normal                | -5.376 0.3931  |
|  | emission of CO2 in WWTP                             | 577.2                     | g CO2/kg COD | log normal                | 6.332 0.2272   |
|  | emission of CH4 in WWTP                             | 6.56                      | g CO2/kg COD | log normal                | 1.855 0.2272   |

## References

Saltelli A., Chan K., Scott M. (2000) *Sensitivity analysis*. John Wiley & Sons, Ltd, New York.

Saltelli A., Tarantola S., Campolongo F., Ratto M. (2004) *Sensitivity analysis in practice; a guide to assessing scientific models*. John Wiley & Sons, Ltd, New York. Isbn 978-0470-87093-8.

Simlab (2004) *Simulation environment for uncertainty and sensitivity analysis*, Version 2.2, developed by the Joint Research Centre of the European Commission.
